# Supplementary material for: Molecular Characterization of Kunitz-Type Protease Inhibitors from Blister Beetles (Coleoptera, Meloidae)
Source: MDPI journal article supplement (doi:10.3390/biom12070988), 2022-07-15
Supplement: s1 [file s1]

## Supplementary Materials

|                                        |                                                             |     |  |  |
|----------------------------------------|-------------------------------------------------------------|-----|--|--|
| <b>Kunitz_Lyd_34901 Frame 1: 93 aa</b> |                                                             |     |  |  |
| 1                                      | ATG TGG AAA ATT CTA TTC TTA TTT ACA TTA ATT ACA ATT TCT ATT | 45  |  |  |
| 1                                      | Met Trp Lys Ile Leu Phe Leu Phe Thr Leu Ile Thr Ile Ser Ile | 15  |  |  |
| 46                                     | GCA AAT GAT GAT CAA CAA GCT GAA GAA ACA CAA TTT ACA CTA AAT | 90  |  |  |
| 16                                     | Ala Asn Asp Asp Gln Gln Ala Glu Glu Thr Gln Phe Thr Leu Asn | 30  |  |  |
| 91                                     | GAT TGT AAA GAA GGT GCA GAA AAG AAC GAT AAA CAA CGT TGT CTA | 135 |  |  |
| 31                                     | Asp Cys Lys Glu Gly Ala Glu Lys Asn Asp Lys Gln Arg Cys Leu | 45  |  |  |
| 136                                    | GCT TAT TTC CGT GTC TAT AAT TGG AAT AAT GAA AAA CAA GCA TGC | 180 |  |  |
| 46                                     | Ala Tyr Phe Arg Val Tyr Asn Trp Asn Asn Glu Lys Gln Ala Cys | 60  |  |  |
| 181                                    | GAA CAA GTT ATC TAT GGT GGT TGT CAC AAA ACT CAC AAT AAT TTC | 225 |  |  |
| 61                                     | Glu Gln Val Ile Tyr Gly Gly Cys His Lys Thr His Asn Asn Phe | 75  |  |  |
| 226                                    | CAA ACA TTT GAA GAT TGT GAG AAA ATC GCT AAA CCG ATT TGT ACA | 270 |  |  |
| 76                                     | Gln Thr Phe Glu Asp Cys Glu Lys Ile Ala Lys Pro Ile Cys Thr | 90  |  |  |
| 271                                    | CAA AAA AAT TAA                                             | 282 |  |  |
| 91                                     | Gln Lys Asn End                                             | 94  |  |  |
| <b>Kunitz_Myl_37778 Frame 1:87 aa</b>  |                                                             |     |  |  |
| 1                                      | ATG ATG AAA ATT TGC TTT CTG TTA TCA GTT TTA ATA ATT TCA ACA | 45  |  |  |
| 1                                      | Met Met Lys Ile Cys Phe Leu Leu Ser Val Leu Ile Ile Ser Thr | 15  |  |  |
| 46                                     | TTC GCT GAT AGT TCA GAA ATA GAA TTC ACC AAA GAA GAT TGT ACT | 90  |  |  |
| 16                                     | Phe Ala Asp Ser Ser Glu Ile Glu Phe Thr Lys Glu Asp Cys Thr | 30  |  |  |
| 91                                     | AAA GAT GTT CAA TTT GGC GAC ATT AGT TGT CTG GCT TTA ACT CCC | 135 |  |  |
| 31                                     | Lys Asp Val Gln Phe Gly Asp Ile Ser Cys Leu Ala Leu Thr Pro | 45  |  |  |
| 136                                    | GTT TAT CAT TAT AAT CAC ATA ACA AAA GAG TGT GAG AAT AAG AAT | 180 |  |  |
| 46                                     | Val Tyr His Tyr Asn His Ile Thr Lys Glu Cys Glu Asn Lys Asn | 60  |  |  |
| 181                                    | TAT GGT GGA TGT AAT GCT AGC AAC AAT AAT TTC GCT ACG AAA GAA | 225 |  |  |
| 61                                     | Tyr Gly Gly Cys Asn Ala Ser Asn Asn Asn Phe Ala Thr Lys Glu | 75  |  |  |
| 226                                    | CAG TGC GAG AAA ATC GCA TTT CCA GTT TGT CGA TCA TAA         | 264 |  |  |
| 76                                     | Gln Cys Glu Lys Ile Ala Phe Pro Val Cys Arg Ser End         | 88  |  |  |
| <b>Kunitz_Lyd_46461 Frame 1: 79 aa</b> |                                                             |     |  |  |
| 1                                      | ATG TTT AAT AAT AGC TIG AAT AAC ATT ATT ATT ATT ATT TTT     | 45  |  |  |
| 1                                      | Met Phe Asn Asn Ser Leu Asn Asn Ile Ile Ile Ile Ile Phe     | 15  |  |  |
| 46                                     | GTA GAT TGT AAC GAA GGT GCA GAA AAG AAC GAT AAA CAA CGT TGT | 90  |  |  |
| 16                                     | Val Asp Cys Asn Glu Gly Ala Glu Lys Asn Asp Lys Gln Arg Cys | 30  |  |  |
| 91                                     | CTA GCT TAT TTC CGT GTC TAT AAT TGG AAT AAT GAA AAA CAA GCA | 135 |  |  |
| 31                                     | Leu Ala Tyr Phe Arg Val Tyr Asn Trp Asn Asn Glu Lys Gln Ala | 45  |  |  |
| 136                                    | TGC GAA CAA GTT ATC TAT GGT GGT TGT CAC AAA ACT CAC AAT AAT | 180 |  |  |
| 46                                     | Cys Glu Gln Val Ile Tyr Gly Gly Cys His Lys Thr His Asn Asn | 60  |  |  |
| 181                                    | TTC CAA ACA TTT GAA GAT TGT GAG AAA ATC GCT AAA CCG ATT TGT | 225 |  |  |
| 61                                     | Phe Gln Thr Phe Glu Asp Cys Glu Lys Ile Ala Lys Pro Ile Cys | 75  |  |  |
| 226                                    | ACA CAA AAA AAT TAA                                         | 240 |  |  |
| 76                                     | Thr Gln Lys Asn End                                         | 80  |  |  |

Figure S1. Transcript and protein sequence from three sequenced clones with Leu at P1 site. Yellow, leader peptide sequence; blue, Cys residues involved in disulphide bridges; green, P1 residue.



Figure S2. Alignment of Kunitz domain sequences from insects; green, Kunitz family signature sequence; blue, P1 site; red, Cys involved in disulphide bridges. \* (asterisk) indicates positions which have a single, fully conserved residue; : (colon) indicates conservation between groups of strongly similar properties.
